# Supplementary material for: ROS-Responsive Sequential Release Systems with Excellent Biofilm Permeability for Enhanced Antibacterial and Regeneration-promoting Therapy in Periodontitis
Source: Research Square preprint supplement (doi:10.21203/rs.3.rs-2425666/v1), 2023-01-04
Supplement: Supplementary file 1 [file 02556a1ed3ec0c156b69ce48.docx]

Supporting Information

ROS-Responsive Sequential Release Systems with Excellent Biofilm Permeability for Enhanced Antibacterial and Regeneration-promoting Therapy in Periodontitis


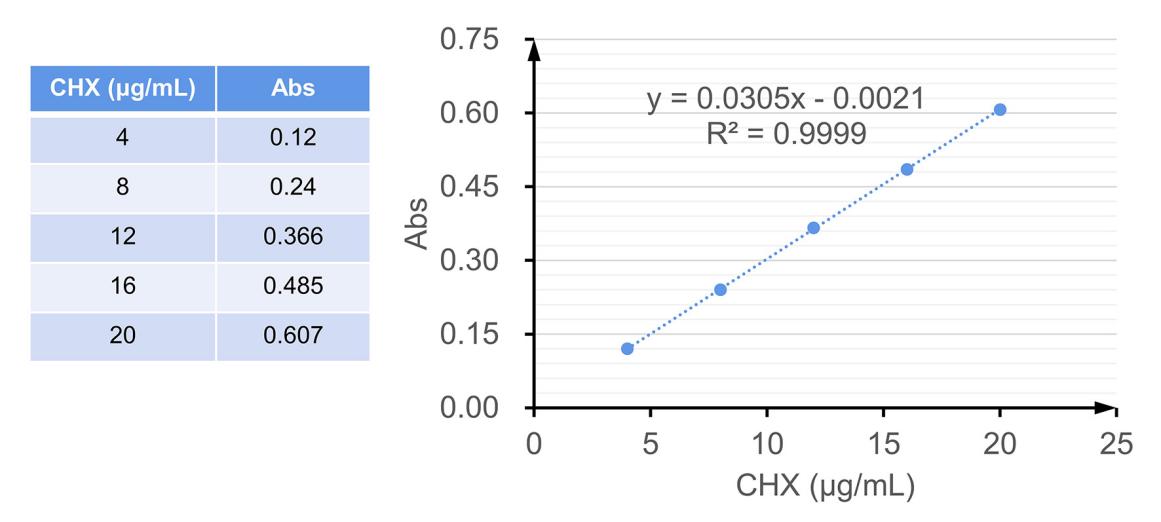


Fig.S1 Standard curve of CHX.


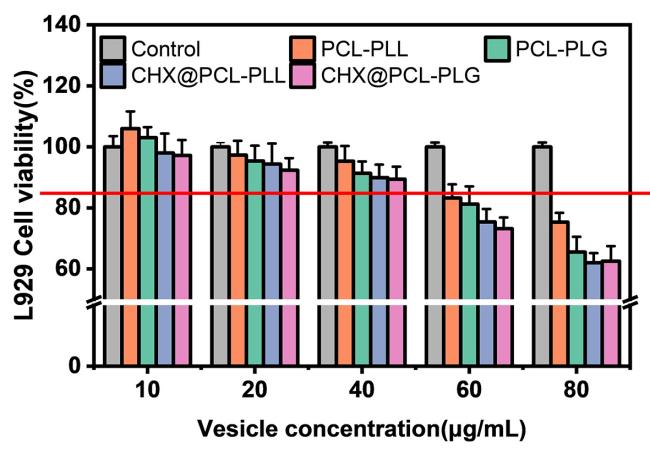


Fig.S2 Cytotoxicity assay.


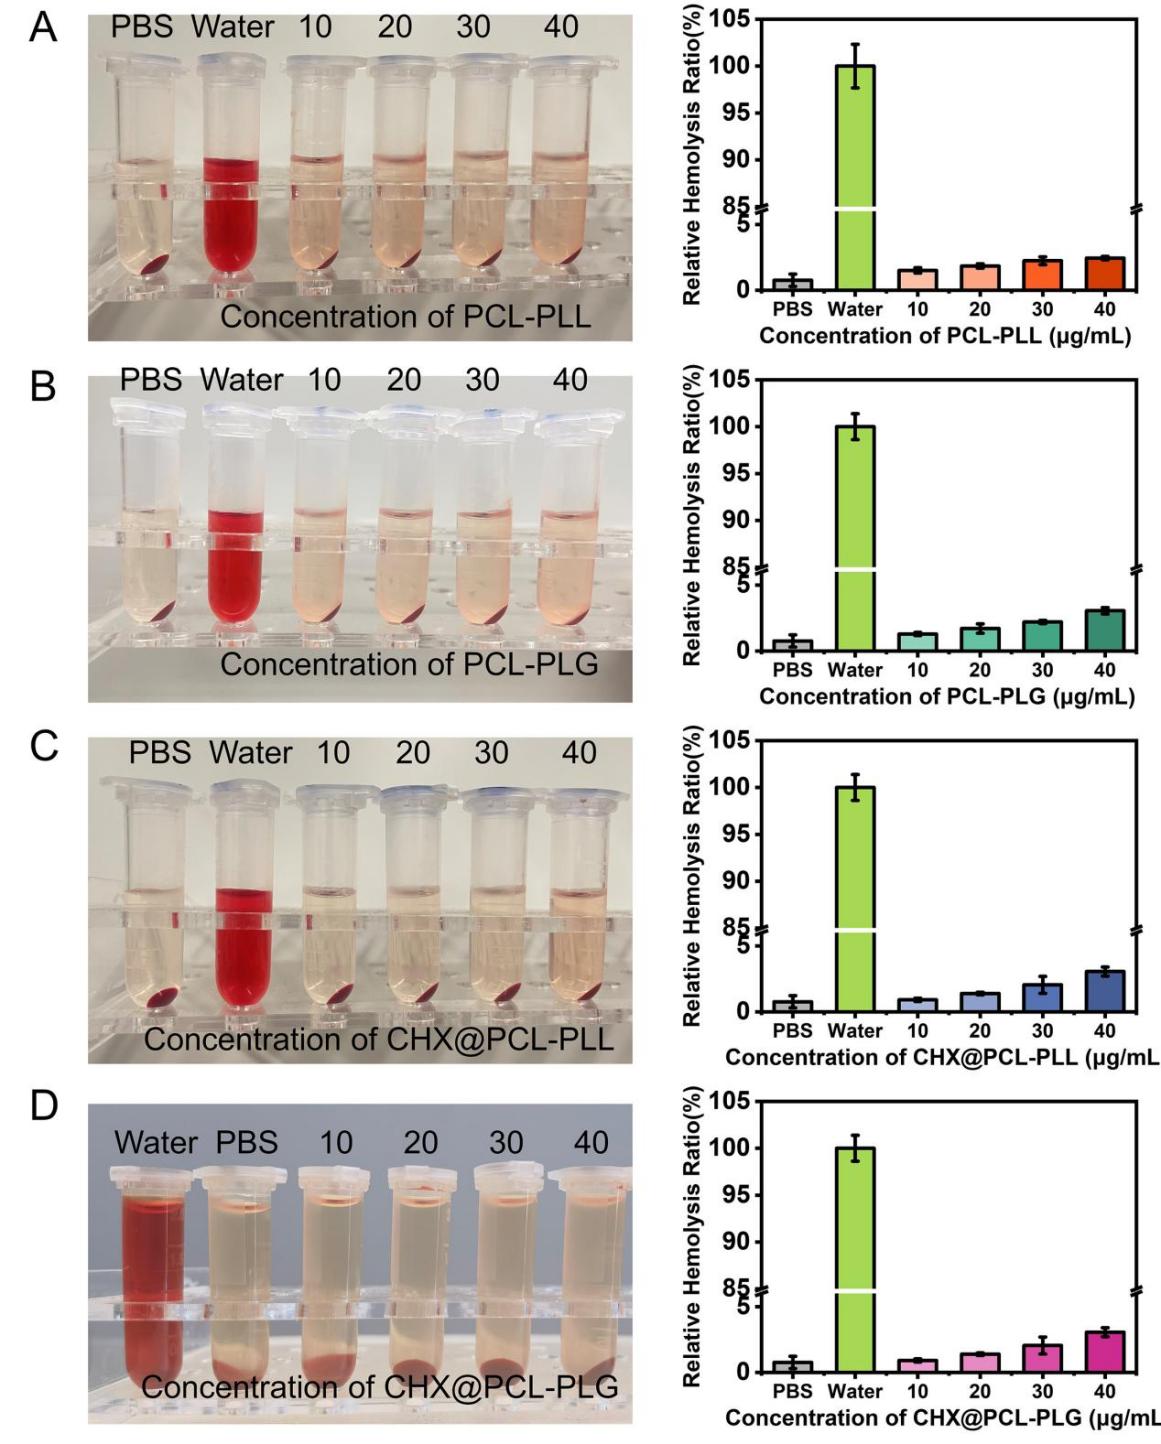


Fig.S3 A-D) Hemolysis assay of vesicles at different concentrations.


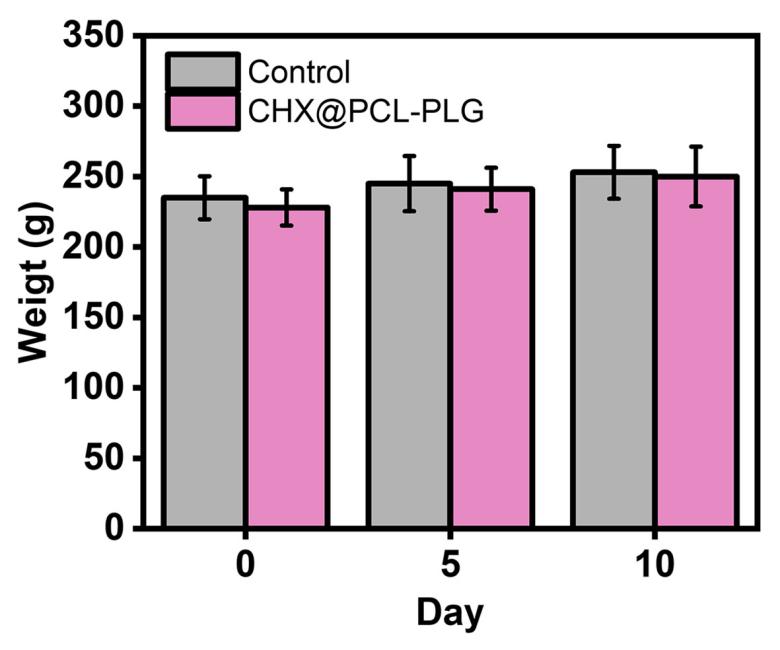


Fig.S4 Body weight of rats.


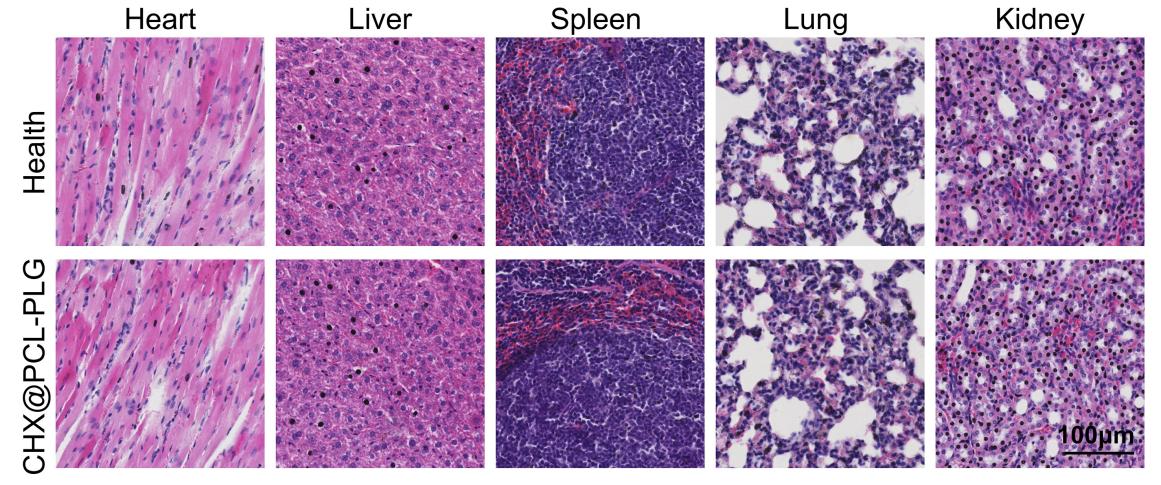


Fig.S5 H&E staining images of heart, liver, spleen, lung and kidney sections from rats.


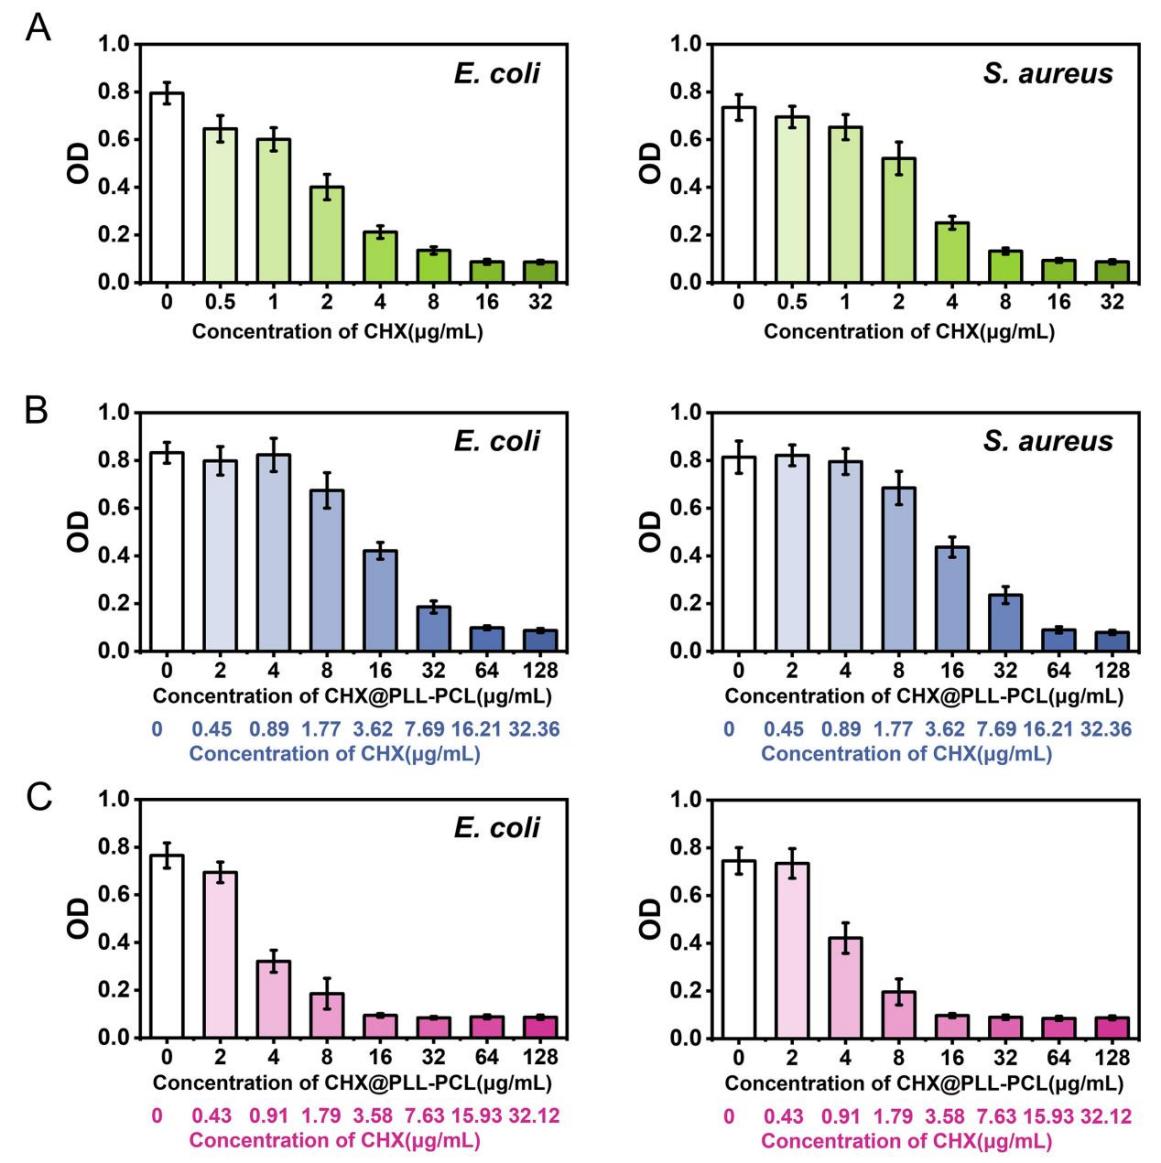


Fig.S6 A-C) Bacterial MIC experiments for CHX, CHX@PCL-PLL and CHX@PCL-PLG.


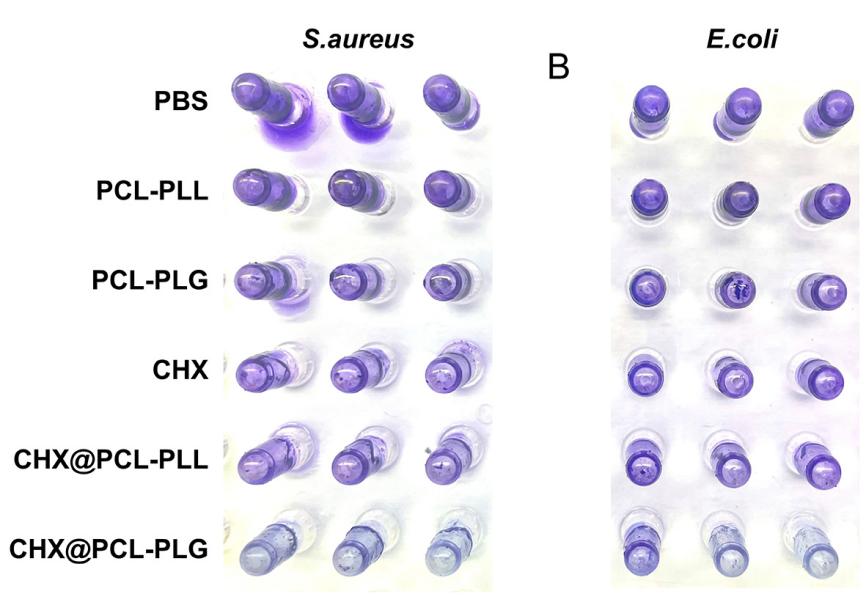


Fig.S7 Biofilm disruption experiments.


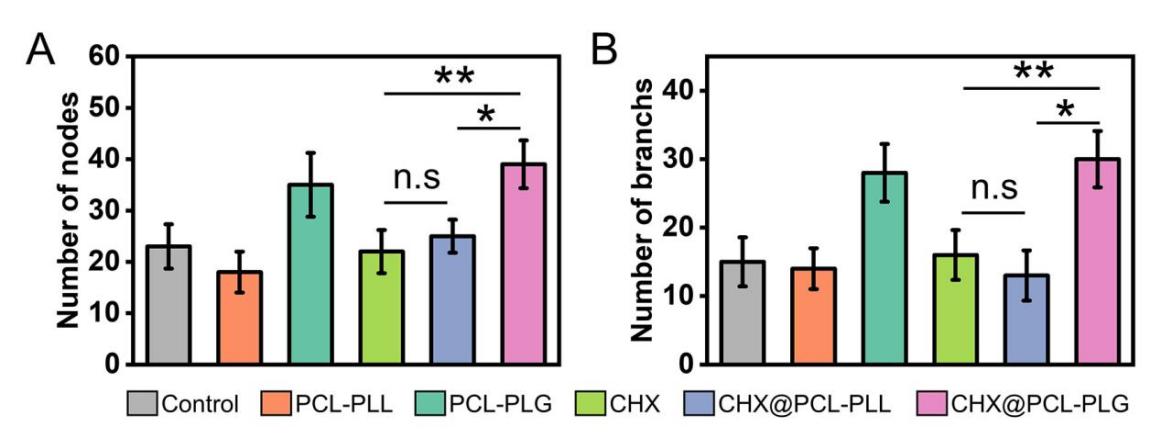


Fig.S8 Statistical analysis of the number of nodes and segments for tube formation experiments.
